# Supplementary material for: The Relationships between Screen Use and Health Indicators among Infants, Toddlers, and Preschoolers: A Meta-Analysis and Systematic Review
Source: MDPI journal article supplement (doi:10.3390/ijerph17197324), 2020-10-07
Supplement: s1 [file s1]

**The relationships between screen use and health indicators  
among infants, toddlers and preschoolers: A meta-analysis and**

systematic review

Appendix

**Supplemental Files 1:**

**Table S1.** The characteristics of the studies included in this review

**Table S2.** GRADE assessment of quality of evidence reported the associations  
between media use and health indicators.

**Table S1.** The characteristics of the studies included in this review

| <i>Author,<br/>date</i>                     | Study<br>design                      | N   | Age group<br>(months)              | Country                              | Measurem<br>ents              | The way<br>described screen<br>time use | Media devices<br>examined                                                                          | Screen time group                                                              | Health<br>domain                  | Health indicators                                                                                       | Quality                             |
|---------------------------------------------|--------------------------------------|-----|------------------------------------|--------------------------------------|-------------------------------|-----------------------------------------|----------------------------------------------------------------------------------------------------|--------------------------------------------------------------------------------|-----------------------------------|---------------------------------------------------------------------------------------------------------|-------------------------------------|
| <i>Ariza et al.<br/>2004<sup>1</sup></i>    | Cross-<br>sectiona<br>l study        | 80  | 60-72                              | America<br>(Mexican<br>American<br>) | Maternal<br>report:<br>survey | Viewing<br>categories<br>(hours/day)    | TV                                                                                                 | ≤3<br><br>>3                                                                   | Physical                          | Adiposity (Overweight<br>(BMI:25-29.9))                                                                 | 6                                   |
| <i>Barr et al.<br/>2008<sup>2</sup></i>     | Quasi-<br>experim<br>ental<br>design | 120 | 12(40)<br><br>15(40)<br><br>18(40) | America                              | Parent<br>report:<br>survey   | Mean (SD)<br>(hours/day)                | TV                                                                                                 | 3.67(2.46)                                                                     | Psycho-<br>social<br><br>Physical | Parent interaction<br>(Responsiveness)<br><br>Cognitive development<br>(Learning)                       | Low<br>bias<br>(Selecti<br>ve bias) |
| <i>Bedford et<br/>al. 2016<sup>3</sup></i>  | Cross-<br>sectiona<br>l study        | 612 | 6-36                               | England                              | Parent<br>report:<br>survey   | Mean (SD)<br>(hours/day)                | Touchscreen                                                                                        | 0.41(0.65)                                                                     | Physical                          | Cognitive development<br>(Language<br>development)<br>Motor development<br>(Fine motor, Gross<br>motor) | 7                                   |
| <i>Beyens et<br/>al. 2019<sup>4</sup></i>   | Cross-<br>sectiona<br>l study        | 402 | 36-60                              | America                              | Maternal<br>report            | Mean (SD)<br>(hours/day)                | TV<br>Mobile devices<br>Tablet devices<br>Handheld game<br>player<br>Laptop computer<br>Smartphone | 3.8(2.64)<br>3.08(4.08)<br>1.4(2.11)<br>0.59(1.39)<br>0.51(1.33)<br>0.41(1.11) | Behavioral                        | Sleep problems                                                                                          | 6                                   |
| <i>Brambilla<br/>et al 2017<sup>5</sup></i> | Cross-<br>sectiona<br>l study        | 523 | 0-36                               | Italy                                | Parent<br>report:             | Prevalence                              | TV                                                                                                 | 39.6%                                                                          | Behavioral                        | Sleep problems                                                                                          | 7                                   |

| Table 1. Characteristics of the studies included in the meta-analysis |                       |      |                |           |                         |                                |                  |                                      |                                                   |                                              |        |
|-----------------------------------------------------------------------|-----------------------|------|----------------|-----------|-------------------------|--------------------------------|------------------|--------------------------------------|---------------------------------------------------|----------------------------------------------|--------|
| Author (Year)                                                         | Study Design          | N    | Age (years)    | Country   | Report Source           | Measure                        | Media            | Effect Size (95% CI)                 | Outcome                                           | Outcome                                      | Weight |
| Brockman et al. 2016 <sup>6</sup>                                     | Cross-sectional study | 100  | 12-72          | Chile     | Parent report: survey   | Median (min-max) (hours/day)   | TV               | 0.042(0.008,0.018)                   | Behavioral                                        | Sleep problems                               | 7      |
| Byeon et al. 2015 <sup>7</sup>                                        | Cross-sectional study | 1778 | 24-30          | Korea     | Parent report: survey   | Mean (SD) (hours/day)          | TV               | 1.21(0.99)                           | Physical                                          | Cognitive development (Language development) | 7      |
| Cespedes et al. 2014 <sup>8</sup>                                     | Cohort study          | 1864 | 12-84          | America   | Parent report: survey   | Mean (SD) (hours/day)          | TV               | 6months:0.9 (1.2)                    | Behavioral                                        | Sleep problems(duration)                     | 7      |
| Chen et al..2019 <sup>9</sup>                                         | Cross-sectional study | 714  | 0-6(321)       | Singapore | Parent report: survey   | Median (IQR) (hours/day)       | ALL              | 1.00 (0.50–2.00)                     | Behavioral                                        | Sleep problems(duration)                     | 7      |
|                                                                       |                       |      | TV             |           |                         |                                | 0.98 (0.43–2.00) |                                      |                                                   |                                              |        |
|                                                                       |                       |      | Mobile devices |           |                         |                                | 0.50 (0.25–1.00) |                                      |                                                   |                                              |        |
|                                                                       |                       |      | 6-24(393)      |           |                         |                                | Computer         | 0.50 (0.36–1.00)                     |                                                   |                                              |        |
| Cheng et al. 2010 <sup>10</sup>                                       | Cohort study          | 302  | 18-30          | Japan     | Maternal report: survey | Viewing categories (hours/day) | TV               | <1                                   | Psycho-social (Behavioral and emotional outcomes) | Emotional symptoms                           | 7      |
|                                                                       |                       |      |                |           |                         |                                |                  | ≥1 to <3                             |                                                   | Conduct problems                             |        |
|                                                                       |                       |      |                |           |                         |                                |                  | ≥3 to <4                             |                                                   | Hyperactivity-Inattention                    |        |
|                                                                       |                       |      |                |           |                         |                                |                  | ≥4                                   |                                                   | Peer-problems                                |        |
| Cheung et al.2017 <sup>11</sup>                                       | Cross-sectional study | 612  | 6-36           | England   | Parent report           | Mean (SD) (hours/day)          | Touchscreen      | 0.41(0.65)                           | Behavioral                                        | Sleep duration                               | 5      |
|                                                                       |                       |      |                |           |                         |                                |                  |                                      |                                                   | Sleep latency                                |        |
| Christakis et al. 2007 <sup>12</sup>                                  | Cohort study          | 330  | 24-60          | America   | Parent report: survey   | Mean (SD) (hours/day)          | TV (content)     | Educational:0.42 (0.60)              | Psycho-social                                     | Aggressive behavior (Antisocial behaviors)   | 6      |
|                                                                       |                       |      |                |           |                         |                                |                  | Nonviolent entertainment:0.91 (1.00) |                                                   |                                              |        |

|                                            |                       |      |                                |           |                         |                                   |     |                                                                       |                        |                                                                                             |                     |
|--------------------------------------------|-----------------------|------|--------------------------------|-----------|-------------------------|-----------------------------------|-----|-----------------------------------------------------------------------|------------------------|---------------------------------------------------------------------------------------------|---------------------|
|                                            |                       |      |                                |           |                         |                                   |     | Violent<br>entertainment:0.54<br>(0.80)                               |                        |                                                                                             |                     |
| <i>Collings et al. 2018</i> <sup>13</sup>  | Cohort study          | 1338 | 12; 18;<br>24(798);<br>36(909) | England   | Parent report: survey   | Mean (SD)<br>(hours/day)          | TV  | All time<br>points:1.3(1.2)<br>36 months:2.1(1.5)<br>24 months:1.3(2) | Physical               | Adiposity (BMI, Sum of skinfolds, Waist circumference)                                      | 7                   |
| <i>Cox et al. 2012</i> <sup>14</sup>       | Cross-sectional study | 135  | 24-72                          | Australia | Maternal report: survey | Mean (SD)<br>(hours/day)          | TV  | Weekday:1.43(0.92)<br>Weekend:1.72(1.11)                              | Physical<br>Behavioral | Adiposity (BMI z-score)<br>Healthy dietary behavior (Energy intake, fast foods, vegetables) | 7                   |
| <i>De Coen et al..2014</i> <sup>15</sup>   | cohort study          | 568  | 36-72                          | Belgium   | Parent report: survey   | Viewing categories<br>(hours/day) | ALL | Weekday:>1; ≤1<br>Weekend:>2; ≤2                                      | Physical               | Adiposity (Overweight)                                                                      | 7                   |
| <i>Ebenegger et al. 2012</i> <sup>16</sup> | Cross-sectional study | 450  | 48-72                          | Swiss     | Parent report: survey   | Mean (SD)<br>(hours/day)          | TV  | 0.93(0.82)                                                            | Psycho-social          | Behavioral and emotional outcomes (Hyperactivity/Inattention)                               | 7                   |
| <i>Foster et al. 2010</i> <sup>17</sup>    | Cohort study          | 1159 | 12, 36                         | America   | Parent report           | Viewing categories<br>(hours/day) | TV  | 0<br>0-1<br>1-2<br>2-3<br>3-4<br>4-5<br>5-6<br>6-7<br>≥7              | Psycho-social          | Behavioral and emotional outcomes (Attentional problems)                                    | 7                   |
| <i>Garrison et al. 2011</i> <sup>18</sup>  | RCT                   | 617  | 36-60                          | America   | Parent report:          | Mean (SD)<br>(hours/day)          | TV  | Daytime: 0.98(0.71)<br>Evening:0.24(0.29)                             | Behavioral             | Sleep problems                                                                              | Low bias<br>(Measur |

| Table 1. Characteristics of the studies included in the meta-analysis |                       |      |             |                  |                                  |                                |                                                                                                    |                                                       |              |                                                                                                                                         |                             |
|-----------------------------------------------------------------------|-----------------------|------|-------------|------------------|----------------------------------|--------------------------------|----------------------------------------------------------------------------------------------------|-------------------------------------------------------|--------------|-----------------------------------------------------------------------------------------------------------------------------------------|-----------------------------|
| Study                                                                 | Study design          | N    | Age (years) | Country          | Parent report: survey(interview) | Content                        | Media                                                                                              | Unhealthy media: violent or age-inappropriate content | Behavioral   | Outcomes                                                                                                                                | Measurement bias (Low bias) |
| Garrison et al. 2012 <sup>19</sup>                                    | RCT                   | 565  | 36-60       | America          | Parent report: survey(interview) | Content                        | TV                                                                                                 | 0                                                     | Behavioral   | Sleep problems                                                                                                                          | Low bias (Measurement bias) |
| Gubbels et al. 2009 <sup>20</sup>                                     | Cross-sectional study | 2471 | 24          | Netherlands      | Parent report: survey            | Viewing categories (hours/day) | TV<br>Computer                                                                                     | 0.01-0.24<br>0.25-0.99<br>1-1.99<br><2<br>≥2          | Behavioral   | Healthy dietary behavior quality (Snacks, Brown bread, Fresh fruit, Sugar-sweetened drinks, Light soft drinks, Vegetables, White bread) | 7                           |
| Helm et al. 2019 <sup>21</sup>                                        | Cross-sectional study | 470  | 33-71       | America          | Parent report: survey            | Viewing categories (hours/day) | TV                                                                                                 | 0<br><1<br>1-3<br>4-6<br>≥ 7<br>1.4(0.85)             | Behavioral   | Sleep problems                                                                                                                          | 8                           |
| Hinkley et al. 2017 <sup>22</sup>                                     | Cohort study          | 108  | 36-60       | Australia        | Parent report: survey            | Mean (SD) (hours/day)          | TV<br>Sedentary electronic games<br>Active electronic games<br>Computer/internet (excluding games) | 0.12(0.29)<br>0.04(0.09)<br>0.10(0.23)                | Psychosocial | Emotional and social skills (Intrapersonal, Stress management, Interpersonal, Adaptability)                                             | 7                           |
| Hinkley et al. 2014 <sup>23</sup>                                     | Cohort study          | 3604 | 24-72       | Belgium; Cyprus; |                                  | Mean (SD) (hours/day)          | Weekday television                                                                                 | Boy:1.04 (0.75); Girl:0.98(0.70)                      | Psychosocial | Behavioral and emotional outcomes                                                                                                       | 8                           |

|                                         |                              |                   |                              |                                                                |                                        |                                      |                                                           |                                                                                                                       |                   |                                                                                          |                                 |
|-----------------------------------------|------------------------------|-------------------|------------------------------|----------------------------------------------------------------|----------------------------------------|--------------------------------------|-----------------------------------------------------------|-----------------------------------------------------------------------------------------------------------------------|-------------------|------------------------------------------------------------------------------------------|---------------------------------|
|                                         |                              |                   |                              | Estonia;<br>Germany;<br>Hungary;<br>Italy;<br>Spain;<br>Sweden | Parent<br>report:<br>survey            |                                      | Weekend<br>television<br><br>Weekday PC<br><br>Weekend PC | Boy:1.62 (0.93); Girl:<br>1.53 (0.91)<br>Boy:0.19 (0.39);<br>Girl:0.11 (0.26)<br>Boy:0.33 (0.56);<br>Girl:0.21 (0.40) |                   | (Emotional problems,<br>Peer problems, Self-<br>esteem, Emotional well-<br>being)        |                                 |
| <i>Howie et al. 2017</i> <sup>24</sup>  | Subject<br>laboratory trial  | 6                 | 36-60                        | Australia                                                      | Parent<br>report                       | Range (hours/day)                    | mobile<br>touchscreen                                     | (0.33,2.7)                                                                                                            | Behavioral        | Sedentary behaviors                                                                      | Low<br>bias<br>(Selective bias) |
|                                         |                              |                   |                              |                                                                |                                        |                                      |                                                           | <1                                                                                                                    | Physical          | Musculoskeletal risk                                                                     |                                 |
| <i>Hu et al. 2019</i> <sup>25</sup>     | Case-<br>control<br>study    | 933               | 12-24(264)<br><br>48-60(669) | China                                                          | Parent<br>report:<br>survey(interview) | Viewing<br>categories<br>(hours/day) | TV                                                        | ≥1                                                                                                                    | Behavioral        | Adiposity (Overweight)<br><br>Sleep problems) Sleep<br>duration<br><br>Physical activity | 7                               |
|                                         |                              |                   |                              |                                                                |                                        |                                      |                                                           | 0<br><1<br>1-2<br>2-3<br>3-4<br>4-5<br>>5                                                                             |                   |                                                                                          |                                 |
| <i>Inoue et L. 2016</i> <sup>26</sup>   | Cohort<br>study              | 3243<br>9         | 36-60                        | Japan                                                          | Parent<br>report:<br>survey            | Viewing<br>categories<br>(hours/day) | TV                                                        |                                                                                                                       | Psycho-<br>social | Emotional and social<br>skills (Self-Regulation)                                         | 7                               |
| <i>Jago et al. 2005</i> <sup>27</sup>   | Cohort<br>study              | 149<br>147<br>133 | 36-48<br>48-60<br>60-72      | America                                                        | Maternal<br>report                     | not mentioned                        | TV                                                        | not mentioned                                                                                                         | Physical          | Adiposity (BMI)                                                                          | 7                               |
| <i>Ji et al. 2018</i> <sup>28</sup>     | Cross-<br>sectional<br>study | 112               | 36-72                        | China                                                          | Parent<br>report:<br>survey            | Mean (SD)<br>(hours/day)             | ALL                                                       | Weekday:0.75(0.7);<br>Weekend:2.07(1.64)                                                                              | Behavioral        | Sleep problems                                                                           | 7                               |
| <i>Jouret et al. 2007</i> <sup>29</sup> |                              | 298(<br>boy)      | 48                           | France                                                         | Parent<br>report                       | not mentioned                        | TV                                                        | not mentioned                                                                                                         | Physical          | Adiposity (Overweight<br>(BMI≥90% percent))                                              | 7                               |

|                                      |                       |                     |                    |           |                                  |                               |                                                            |                                       |               |                                                                                            |   |  |
|--------------------------------------|-----------------------|---------------------|--------------------|-----------|----------------------------------|-------------------------------|------------------------------------------------------------|---------------------------------------|---------------|--------------------------------------------------------------------------------------------|---|--|
|                                      | Cross-sectional study | 295(girl)           |                    |           |                                  |                               |                                                            |                                       |               |                                                                                            |   |  |
| Kirkorian et al. 2016 <sup>30</sup>  | Cross-sectional study | 58(boy)<br>58(girl) | 23.5-36            | America   | Parent report: survey            | Range (hours/day)             | ALL<br>TV<br>Interactive media                             | (0,3.58)<br>(0,3.33)<br>(0,1)         | Physical      | Cognitive development (Language learning)                                                  | 6 |  |
| Lillard et al. 2011 <sup>31</sup>    | Cross-sectional study | 60                  | 48                 | America   | Parent report: survey            | Range (hours/day)             | Fast-Paced Television<br>Educational Television<br>Drawing | 0.8(0.16)<br>0.66(0.16)<br>0.91(0.16) | Physical      | Executive function                                                                         | 6 |  |
| Lin et al. 2015 <sup>32</sup>        | Cross-sectional study | 150                 | 15-36              | China     | Parent report: survey(interview) | Mean (hours/day)              | TV                                                         | 2.28                                  | Physical      | Cognitive development<br>Cognitive development (Language development)<br>Motor development | 7 |  |
| Lumeng et al. 2006 <sup>33</sup>     | Cross-sectional study | 1016                | 36                 | America   | Maternal report                  | Viewing categories(hours/day) | TV                                                         | <2<br>≥2                              | Physical      | Adiposity (Overweight (BMI≥95%))                                                           | 7 |  |
| Manganello et al. 2009 <sup>34</sup> | Cohort study          | 3128                | 36                 | America   | Maternal report                  | Mean (SD) (hours/day)         | TV                                                         | 3.2(2.3)                              | Psycho-social | Aggressive behavior                                                                        | 7 |  |
| Manios et al. 2009 <sup>35</sup>     | Cohort study          | 2241                | 12-69              | Greece    | Parental report                  | Mean (SD) (hours/day)         | TV                                                         | 1.32(1.12)                            | Physical      | Adiposity (Overweight(95%>BMI≥85%), Obese (BMI≥95%))                                       | 7 |  |
| Marinelli et al. 2014 <sup>36</sup>  | Cohort study          | 1444                | 24(657)<br>48(787) | Spain     | Maternal report                  | Viewing categories(hours/day) | TV                                                         | <0.5<br>≥0.5                          | Behavioral    | Sleep duration                                                                             | 7 |  |
|                                      |                       | 185                 | 43.2-57.6          | Australia |                                  |                               | ALL                                                        | 2.42(1.33)                            | Physical      | Executive Function                                                                         | 6 |  |

|                                              |                       |      |           |         |                                  |                               |                                                   |                                                    |               |                                                                                    |   |
|----------------------------------------------|-----------------------|------|-----------|---------|----------------------------------|-------------------------------|---------------------------------------------------|----------------------------------------------------|---------------|------------------------------------------------------------------------------------|---|
| <i>McNeill et al. 2019</i> <sup>37</sup>     | Cohort study          |      |           |         | Parent report: survey            | Mean (SD) (hours/day)         | TV                                                | 2.04(1.14)                                         | Psycho-social | Behavioral and emotional outcomes (Internalizing problems, Externalizing problems) |   |
|                                              |                       |      |           |         |                                  |                               | ALL                                               | >2<br>≤2                                           |               |                                                                                    |   |
|                                              |                       |      |           |         |                                  |                               | TV                                                | >2<br>≤2                                           |               |                                                                                    |   |
| <i>Mendoza et al. 2007</i> <sup>38</sup>     | Cross-sectional study | 1809 | 24-60     | America | Parent report: survey            | Viewing categories(hours/day) |                                                   | 0<br><1<br>1<br>2<br>3<br>4<br>≥5                  | Physical      | Adiposity (Overweight, Sum of skinfolds)                                           | 7 |
|                                              |                       |      |           |         |                                  |                               | Computer                                          |                                                    |               |                                                                                    |   |
| <i>Mezie-Okoye et al. 2015</i> <sup>39</sup> | Cross-sectional study | 198  | 24-60     | Nigeria | Maternal report                  | Viewing categories(hours/day) | ALL                                               | ≤1<br>>1                                           | Physical      | Adiposity (Overweight (BMI≥85%))                                                   | 8 |
| <i>Miller et al. 2007</i> <sup>40</sup>      | Cohort study          | 107  | 34.8-70.4 | America | Parent report: survey(interview) | not mentioned                 | TV                                                | not mentioned                                      | Physical      | Behavioral and emotional outcomes (Attentional problems)                           | 6 |
| <i>Nathanson et al. 2014</i> <sup>41</sup>   | Cross-sectional study | 107  | 38-74     | America | Parent report: survey            | Mean (SD) (hours/day)         | TV (background)                                   | 2.87(1.99)                                         | Physical      | Executive function                                                                 | 6 |
| <i>Nathanson et al. 2018</i> <sup>42</sup>   | cross-sectional study | 402  | 36-60     | America | Maternal report                  | Mean (SD) (hours/day)         | TV<br>Tablet devices<br>Smartphone<br>Game player | 3.8(2.64)<br>1.4(2.11)<br>0.41(1.11)<br>0.59(1.39) | Behavioral    | Sleep problems (Sleep duration, Sleep latency)                                     | 7 |



|                                           |                       |       |       |         |                       |                               |                           |                        |               |                                                      |   |
|-------------------------------------------|-----------------------|-------|-------|---------|-----------------------|-------------------------------|---------------------------|------------------------|---------------|------------------------------------------------------|---|
|                                           |                       |       |       |         |                       |                               | Laptop computer           | 0.51(1.33)             |               |                                                      |   |
|                                           |                       |       |       |         |                       |                               | iPod                      | 0.17(0.78)             |               |                                                      |   |
|                                           |                       | 1676  | 6     |         |                       |                               |                           | 6months:0.89 (1.21)    |               |                                                      |   |
| <i>Nevarez et al. 2010</i> <sup>43</sup>  | Cohort study          | 1228  | 12    | America | Maternal report       | Mean (SD) (hours/day)         | TV                        | 12months:1.20 (1.46)   | Behavioral    | Sleep problems(duration)                             | 7 |
|                                           |                       | 1365  | 24    |         |                       |                               |                           | 24months:1.44 (1.22)   |               |                                                      |   |
| <i>Paavonen et al. 2006</i> <sup>44</sup> | Cross-sectional study | 321   | 60-72 | Finland | Parent report: survey | Viewing categories(hours/day) | TV (content)              | <1.66<br>≥1.66         | Behavioral    | Sleep problems                                       | 7 |
|                                           |                       | 1997  | 29    |         |                       |                               |                           |                        | Psycho-social | Bullying                                             |   |
| <i>Pagani et al. 2013</i> <sup>45</sup>   | Cohort study          | 1997  | 65    | Canada  | Parent report: survey | Mean (SD) (hours/day)         | TV                        | 29months: 1.62(1.21)   | Physical      | Cognitive development (mathematics, learning)        | 7 |
|                                           |                       |       |       |         |                       |                               |                           |                        |               | Motor development (Gross motor)                      |   |
|                                           |                       |       |       |         |                       |                               |                           | 0-2<br>2.1-4<br>4.1-6  |               | Behavioral problems                                  |   |
| <i>Parent et al. 2016</i> <sup>46</sup>   | Cohort study          | 209   | 36-84 | America | Parent report: survey | Viewing categories(hours/day) | ALL                       | 6.1-8<br>8.1-10<br>>10 | Behavioral    | Sleep problems                                       | 6 |
|                                           |                       | 11014 | 60    |         |                       |                               | Television/video/DVD      | 0<br><1<br>≥1,<3       | Psycho-social | Behavioral and emotional outcomes (Conduct problems, | 7 |
| <i>Parkes et al. 2013</i> <sup>47</sup>   | Cohort study          | 11014 | 84    | England | Parent report         | Viewing categories(hours/day) | Computer/electronic games | ≥3,<5<br>≥5,<7         |               | Hyperactivity/inattention, Emotional symptoms,       |   |

|                                                |                       |       |             |          |                                  |                               |     |                                                                                        |               |                                                                    |         |
|------------------------------------------------|-----------------------|-------|-------------|----------|----------------------------------|-------------------------------|-----|----------------------------------------------------------------------------------------|---------------|--------------------------------------------------------------------|---------|
|                                                |                       |       |             |          |                                  |                               |     | ≥7                                                                                     |               | Peer problems, Prosocial behavior)                                 |         |
| <i>Peck et al. 2015</i> <sup>48</sup>          | Cross-sectional study | 12385 | 48-72       | America  | Parent report: survey            | Viewing categories(hours/day) | TV  | ≥1;<1<br>≥2;<2                                                                         | Physical      | Adiposity (Obesity, Overweight)                                    | 7       |
| <i>Pinhas-Hamiel et al. 2009</i> <sup>49</sup> | Cross-sectional study | 204   | 48-72       | Israeli  | Parent report: survey            | Mean (SD) (hours/day)         | ALL | Normal weight (122):4(1.8)<br>Normal weight (51):4(2.2)<br>Normal weight (31):4.6(2.5) | Physical      | Adiposity (Overweight)                                             | 7       |
| <i>Plancoulaine et al. 2018</i> <sup>50</sup>  | Cohort study          | 1205  | 60-72       | France   | Maternal report                  | Mean (SD) (hours/day)         | TV  | 0.76(0.7)                                                                              | Behavioral    | Sleep duration                                                     | 7       |
| <i>Raman et al. 2017</i> <sup>51</sup>         | Cross-sectional study | 210   | 12-36       | America  | Parent report: survey            | not mentioned                 | ALL | not mentioned                                                                          | Psycho-social | Social-emotional delay                                             | 7       |
| <i>Reilly et al. 2005</i> <sup>52</sup>        | Cohort study          | 8234  | 0-36        | England  | Parent report: survey            | not mentioned                 | TV  | not mentioned                                                                          | Physical      | Adiposity (Obesity)                                                | 7       |
| <i>Ribner et al. 2017</i> <sup>53</sup>        | RCT                   | 807   | 60.88-76.84 | America  | Parent report                    | Mean (SD) (hours/day)         | TV  | 2.19(0.79)                                                                             | Psycho-social | Cognitive development (language development, mathematics)          | no bias |
| <i>Ruangdaranon et al. 2009</i> <sup>54</sup>  | Cohort study          | 220   | 0-24        | Thailand | Parent report: survey(interview) | Mean (SD) (hours/day)         | TV  | 12months:1.23(1.42)<br>24months:1.69(1.56)                                             | Physical      | Executive function<br>Cognitive development (language development) | 8       |
|                                                |                       | 759   | 36-48       |          |                                  |                               | ALL | 1.02(0.67)                                                                             | Physical      | Adiposity (BMI)                                                    | 7       |

|                                            |                       |              |          |             |                                     |                               |                                        |                          |              |                                            |   |
|--------------------------------------------|-----------------------|--------------|----------|-------------|-------------------------------------|-------------------------------|----------------------------------------|--------------------------|--------------|--------------------------------------------|---|
| <i>Sijtsma et al. 2015</i> <sup>55</sup>   | Cohort study          |              |          | Netherlands | Parent report: survey               | Mean (SD) (hours/day)         | TV<br>Computer                         | 0.97(0.63)<br>0.05(0.15) | Behavioral   | Sleep problems (Sleep duration)            |   |
| <i>Sisson et al. 2012</i> <sup>(a)56</sup> | Cross-sectional study | 1368         | 24-60    | America     | Parent report: survey               | Viewing categories(hours/day) | TV                                     | ≤1<br>2-3<br>≥4          | Behavioral   | Healthy dietary behavior (Energy intake)   | 6 |
| <i>Sisson et al. 2012</i> <sup>(b)57</sup> | Cross-sectional study | 1423         | 24-60    | America     | Parent report: survey               | Viewing categories(hours/day) | TV                                     | ≤1<br>2-3<br>≥4          | Behavioral   | Healthy dietary behavior (Dietary quality) | 6 |
| <i>Skaug et al. 2018</i> <sup>58</sup>     | Cohort study          | 995<br>795   | 48<br>72 | Norway      | Parent report: survey(interview)    | Mean (SD) (hours/day)         | TV                                     | 0.92(0.57)<br>1.1(0.87)  | Psychosocial | Parent interaction (Responsiveness)        | 7 |
| <i>Sorrie et al..2016</i> <sup>59</sup>    | cross-sectional study | 504          | 36-60    | Ethiopia    | Caregiver report: survey(interview) | Viewing categories(hours/day) | TV                                     | ≤2<br>>2                 | Physical     | Adiposity (Overweight)                     | 6 |
| <i>Straker et al. 2006</i> <sup>60</sup>   | Cohort study          | 1600         | 60       | Australia   | Parent report: survey               | Viewing categories(hours/day) | TV<br>Hand-held games<br>Console games | 0<br><1<br>1-2<br>>2     | Physical     | Musculoskeletal risk                       | 8 |
| <i>Sugimori et al. 2004</i> <sup>61</sup>  | Cohort study          | 8170<br>8170 | 36<br>72 | Japan       | Parent report: survey               | not mentioned                 | TV                                     | not mentioned            | Physical     | Adiposity (Overweight)                     | 7 |
| <i>Suglia et al. 2013</i> <sup>62</sup>    | Cohort study          | 1589<br>1589 | 36<br>60 | America     | Maternal report                     | Viewing categories(hours/day) | TV                                     | ≤2<br>>2                 | Physical     | Adiposity (Obesity)                        | 6 |
| <i>Tahir et al. 2019</i> <sup>63</sup>     | Cohort study          | 3092<br>1    | 36-60    | America     | Maternal report: survey             | Viewing categories(hours/day) | TV                                     | 0<br>0.5<br>1<br>2       | Physical     | Adiposity (Overweight)                     | 7 |

|                                      |                       |      |         |         |                                             |                               |     |                           |                                                   | 3                                                   |   |
|--------------------------------------|-----------------------|------|---------|---------|---------------------------------------------|-------------------------------|-----|---------------------------|---------------------------------------------------|-----------------------------------------------------|---|
|                                      |                       |      |         |         |                                             |                               |     |                           |                                                   | ≥4                                                  |   |
| Tamana et al. 2019 <sup>64</sup>     | Cohort study          | 2427 | 36      | Canada  | Parent report                               | Mean (95%CI) (hours/day)      | ALL | 1.8(1.5,2.1)              | Psycho-social (Behavioral and emotional outcomes) | Externalizing behaviors problems                    | 7 |
|                                      |                       | 2427 | 60      |         |                                             |                               |     |                           |                                                   | Internalizing behaviors problems                    |   |
| Taveras et al. 2006 <sup>65</sup>    | Cross-sectional study | 240  | 24-70.8 | America | Parent report                               | Mean (SD) (hours/day)         | TV  | 1.4(1.1)                  | Behavioral                                        | Healthy dietary behavior quality (Fast Food Intake) | 7 |
| Tester et al. 2018 <sup>66</sup>     | Cohort study          | 7028 | 24-60   | America | Parent report: survey                       | Viewing categories(hours/day) | TV  | >2                        | Physical                                          | Adiposity (Overweight (BMI:85%-94.5%),              | 5 |
|                                      |                       |      |         |         |                                             |                               |     | >3                        |                                                   | Obesity (BMI:95%-                                   |   |
|                                      |                       |      |         |         |                                             |                               | ALL | >2                        |                                                   | 1.2*95%), Severe obesity                            |   |
|                                      |                       |      |         |         |                                             |                               |     | >3                        |                                                   | (BMI≥1.2*95%))                                      |   |
| Thompson et al. 2005 <sup>67</sup>   | cross-sectional study | 1783 | 4-35    | America | Parent report: survey (telephone interview) | Mean (95%CI) (hours/day)      | TV  | 4-11months:0.9 (0.8–1.0)  | Behavioral                                        | Sleep problems (Naptime/Bedtime Schedules)          | 7 |
|                                      |                       |      |         |         |                                             |                               |     | 12-23months:1.6 (1.4–1.8) |                                                   |                                                     |   |
|                                      |                       |      |         |         |                                             |                               |     | 24-35months:2.3 (2.1–2.5) |                                                   |                                                     |   |
| Tomopoulou et al. 2010 <sup>68</sup> | Cohort study          | 259  | 6       | America | Maternal report: survey(interview)          | Mean (SD) (hours/day)         | ALL | 2.55(2.09)                | Physical                                          | Cognitive development                               | 7 |
|                                      |                       |      |         |         |                                             |                               |     |                           | Cognitive development (language development)      |                                                     |   |
|                                      |                       | 75   | 21      | America |                                             |                               | ALL | 21months: 1.97(1.8)       |                                                   | Aggressive behavior                                 | 7 |

|                                             |                       |            |                           |             |                                     |                               |                                                  |                                            |              |                                                                                                                   |   |
|---------------------------------------------|-----------------------|------------|---------------------------|-------------|-------------------------------------|-------------------------------|--------------------------------------------------|--------------------------------------------|--------------|-------------------------------------------------------------------------------------------------------------------|---|
| <i>Tomopoulou et al. 2007</i> <sup>69</sup> | Cohort study          | 96         | 33                        |             | Caregiver report: survey(interview) | Mean (SD) (hours/day)         |                                                  | 33months: 2.13(1.59)                       | Psychosocial | Behavioral and emotional outcomes (Oppositional Defiant problems, Externalizing problems, Hyperactivity problems) |   |
| <i>Tso et al. 2016</i> <sup>70</sup>        | Cross-sectional study | 533        | 65.5                      | China       | Parent report: survey               | Viewing categories(hours/day) | ALL                                              | ≤1<br>>1-3<br>≥3                           | Behavioral   | Sleep problems (Sleep duration)                                                                                   | 7 |
| <i>Twenge et al. 2019</i> <sup>71</sup>     | Cross-sectional study | 13109      | 0-12(3818)<br>24-60(9291) | America     | Parent report: survey               | Viewing categories(hours/day) | TV and Video game<br>Portable electronic devices | <2<br>≥2                                   | Behavioral   | Sleep problems (Sleep duration)                                                                                   | 7 |
| <i>Vallejo et al. 2015</i> <sup>72</sup>    | Cross-sectional study | 140        | 24-72                     | Brazil      | Maternal report                     | not mentioned                 | TV                                               | not mentioned                              | Physical     | Adiposity (Overweight)                                                                                            | 6 |
| <i>Verlinden et al. 2014</i> <sup>73</sup>  | Cohort study          | 1176       | 24-60                     | Netherlands | Parent report: survey               | Viewing categories            | TV                                               | Low<br>Mid-low<br>Mid-high<br>High         | Psychosocial | Bullying (Being a bully, Being a bully-victim, Being a victim)                                                    | 6 |
| <i>Vijakhana et al. 2015</i> <sup>74</sup>  | Cohort study          | 208<br>208 | 6<br>12                   | Thailand    | Caregiver report                    | Mean (SD) (hours/day)         | ALL                                              | 6 months:4.46(2.98)<br>12months:4.81(3.03) | Behavioral   | Sleep problems (Sleep duration)                                                                                   | 7 |
| <i>Watt et al. 2015</i> <sup>75</sup>       | Cohort study          | 1997       | 29                        | Canada      | Maternal report                     | Mean (SD) (hours/day)         | TV                                               | 1.26(0.88)                                 | Psychosocial | Bullying (Victimization at 12 years old)                                                                          | 7 |
| <i>Wu et al. 2017</i> <sup>76</sup>         |                       | 8900       | 36-72                     | China       | Caregiver report                    |                               | ALL                                              | <2                                         | Psychosocial | Behavioral and emotional outcomes                                                                                 | 6 |

|                                            | Cross-sectiona<br>l study |           |            |           |                                                         | Viewing<br>categories(hours/<br>day) |                                                 | ≥2                             |                   | (Emotional symptoms,<br>Conduct problems,<br>Hyperactivity, Peer<br>problems, Prosocial) |         |
|--------------------------------------------|---------------------------|-----------|------------|-----------|---------------------------------------------------------|--------------------------------------|-------------------------------------------------|--------------------------------|-------------------|------------------------------------------------------------------------------------------|---------|
| <i>Xu et al..2016</i> <sup>77</sup>        | RCT                       | 497       | 24         | Australia | Maternal<br>report                                      | Mean (SD)<br>(hours/day)             | ALL                                             | 1.37 (1.02)                    | Behavioral        | Sleep problems (Sleep<br>duration)                                                       | no bias |
|                                            |                           | 415       | 42         |           |                                                         |                                      |                                                 | 2.48 (1.49)                    |                   | Sleep problems (Sleep<br>latency)                                                        |         |
|                                            |                           | 369       | 60         |           |                                                         |                                      |                                                 | 2.25 (1.27)                    |                   |                                                                                          |         |
| <i>Zhao et al. 2018</i> <sup>78</sup>      | Cross-sectiona<br>l study | 1856<br>2 | 36-48      | China     | Parent<br>report:<br>survey                             | Viewing<br>categories(hours/<br>day) | ALL                                             | 0-1<br>1-2<br>2-3<br>3-4<br>>4 | Psycho-<br>social | psychosocial problems                                                                    | 8       |
| <i>Zimmerman et al. 2005</i> <sup>79</sup> | Cohort<br>study           | 1797      | 0-35       | America   | Maternal<br>report                                      | Mean (SD)<br>(hours/day)             | TV                                              | 0-35months:<br>2.2(2.22)       | Physical          | Cognitive development<br>(mathematics, reading<br>comprehension. reading<br>recognition) | 7       |
|                                            |                           | 1797      | 36-60      |           |                                                         |                                      |                                                 | 36-60months:<br>3.29(2.18)     |                   |                                                                                          |         |
|                                            |                           |           |            |           |                                                         |                                      |                                                 | 8-16 months:<br>0.15(0.35)     |                   |                                                                                          |         |
|                                            |                           |           |            |           |                                                         |                                      | DVDs/videos                                     | 17-24 months:<br>0.16(0.43)    |                   |                                                                                          |         |
| <i>Zimmerman et al. 2007</i> <sup>80</sup> | Cross-sectiona<br>l study | 729       | 8-16(384)  | America   | Parent<br>report:<br>survey<br>(telephone<br>interview) | Mean (SD)<br>(hours/day)             | Children's<br>educational shows                 | 8-16 months:<br>0.31(0.7)      | Physical          | Cognitive development<br>(language development)                                          | 5       |
|                                            |                           |           |            |           |                                                         |                                      |                                                 | 17-24 months:<br>0.7(0.96)     |                   |                                                                                          |         |
|                                            |                           |           |            |           |                                                         |                                      |                                                 | 8-16 months:<br>0.16(0.49)     |                   |                                                                                          |         |
|                                            |                           |           | 17-24(345) |           |                                                         |                                      | Movies and<br>children's non-<br>educational TV | 17-24 months:<br>0.39(0.75)    |                   |                                                                                          |         |

---

|  |            |               |
|--|------------|---------------|
|  |            | 8-16 months:  |
|  | Grownup TV | 0.1(0.31)     |
|  |            | 17-24 months: |
|  |            | 0.15(0.41)    |

---

Note:  
RCT: randomized control trail

**Table S2.** GRADE assessment of quality of evidence reported the associations between media use and health indicators.

| No. of participants (No. of studies)                     | Design                | Risk of bias          | Quality assessment       |                         |                        |                  | Summary of findings                                                                                                                                                              |                             |
|----------------------------------------------------------|-----------------------|-----------------------|--------------------------|-------------------------|------------------------|------------------|----------------------------------------------------------------------------------------------------------------------------------------------------------------------------------|-----------------------------|
|                                                          |                       |                       | Inconsistency            | Indirectness            | Imprecision            | Publication bias | Absolute effect                                                                                                                                                                  | Quality of evidence (GRADE) |
| Adiposity                                                |                       |                       |                          |                         |                        |                  |                                                                                                                                                                                  |                             |
| Observational studies                                    |                       |                       |                          |                         |                        |                  |                                                                                                                                                                                  |                             |
| 933 (1) <sup>25</sup>                                    | Case-control study    | No serious limitation | No serious inconsistency | No serious indirectness | No serious imprecision | Undetected       | TV (duration)<br>1/1 studies reported positive associations                                                                                                                      | Low                         |
| 60997(10) <sup>13, 15, 27, 35, 52, 55, 61-63, 66</sup>   | Cohort study          | No serious limitation | No serious inconsistency | No serious indirectness | No serious imprecision | Undetected       | TV (duration)<br>8/8 studies reported positive associations<br>Screen time (duration)<br>2/2 studies reported positive associations                                              | High                        |
| 17064 (10) <sup>14, 29, 33, 38, 39, 48, 49, 59, 72</sup> | Cross-sectional study | No serious limitation | No serious inconsistency | No serious indirectness | No serious imprecision | Undetected       | TV (duration)<br>7/7studies reported positive associations<br>Screen time (duration)<br>2/3 studies reported positive associations<br>1/3 studies reported negative associations | Moderate                    |
| Cognitive development                                    |                       |                       |                          |                         |                        |                  |                                                                                                                                                                                  |                             |
| Intervention studies                                     |                       |                       |                          |                         |                        |                  |                                                                                                                                                                                  |                             |
| 807 (1) <sup>53</sup>                                    | RCT                   | No serious limitation | No serious inconsistency | No serious indirectness | No serious imprecision | Undetected       | TV (duration)<br>1/1 study reported null associations                                                                                                                            | Moderate                    |
| Observational studies                                    |                       |                       |                          |                         |                        |                  |                                                                                                                                                                                  |                             |



|                                      |                       |                       |                          |                         |                        |            |                                            |          |
|--------------------------------------|-----------------------|-----------------------|--------------------------|-------------------------|------------------------|------------|--------------------------------------------|----------|
| 4273 (4) <sup>45, 54, 68, 79</sup>   | Cohort study          | No serious limitation | No serious inconsistency | No serious indirectness | No serious imprecision | Undetected | TV (duration)                              | Low      |
|                                      |                       |                       |                          |                         |                        |            | 2/3 studies reported negative associations |          |
|                                      |                       |                       |                          |                         |                        |            | 1/3 studies reported null associations     |          |
|                                      |                       |                       |                          |                         |                        |            | Screen time (duration)                     |          |
|                                      |                       |                       |                          |                         |                        |            | 1/1 studies reported negative associations |          |
| 3385 (5) <sup>3, 7, 30, 32, 80</sup> | Cross-sectional study | No serious limitation | No serious inconsistency | No serious indirectness | No serious imprecision | Undetected | TV (duration)                              | Low      |
|                                      |                       |                       |                          |                         |                        |            | 2/2 studies reported negative associations |          |
|                                      |                       |                       |                          |                         |                        |            | Touchscreen (duration)                     |          |
|                                      |                       |                       |                          |                         |                        |            | 1/1 studies reported null associations     |          |
|                                      |                       |                       |                          |                         |                        |            | DVD/videos (duration)                      |          |
|                                      |                       |                       |                          |                         |                        |            | 1/1 studies reported null associations     |          |
|                                      |                       |                       |                          |                         |                        |            | Screen time (duration)                     |          |
|                                      |                       |                       |                          |                         |                        |            | 1/1 studies reported positive associations |          |
| 805 (1) <sup>53</sup>                | RCT                   | No serious limitation | No serious inconsistency | No serious indirectness | No serious imprecision | Undetected | Executive function                         | Moderate |
|                                      |                       |                       |                          |                         |                        |            | Intervention studies                       |          |
|                                      |                       |                       |                          |                         |                        |            | Observational studies                      |          |
|                                      |                       |                       |                          |                         |                        |            | TV (duration)                              |          |
|                                      |                       |                       |                          |                         |                        |            | 1/1 studies reported negative associations |          |
| 185 (1) <sup>37</sup>                | Cohort study          | No serious limitation | No serious inconsistency | No serious indirectness | No serious imprecision | Undetected | Screen time (duration)                     | Low      |
|                                      |                       |                       |                          |                         |                        |            | 1/1 studies reported negative associations |          |
| 167 (2) <sup>31, 41</sup>            | Cross-sectional study | No serious limitation | No serious inconsistency | No serious indirectness | No serious imprecision | Undetected | TV (duration)                              | Low      |
|                                      |                       |                       |                          |                         |                        |            | 2/2 studies reported negative associations |          |
| 1997 (1) <sup>45</sup>               | Cohort study          | No serious limitation | No serious inconsistency | No serious indirectness | No serious imprecision | Undetected | Motor development                          | Low      |
|                                      |                       |                       |                          |                         |                        |            | Observational studies                      |          |
|                                      |                       |                       |                          |                         |                        |            | TV (duration)                              |          |
|                                      |                       |                       |                          |                         |                        |            | 1/1 studies reported negative associations |          |
| 762 (2) <sup>3, 32</sup>             | Cross-sectional study | No serious limitation | No serious inconsistency | No serious indirectness | No serious imprecision | Undetected | TV (duration)                              | Low      |
|                                      |                       |                       |                          |                         |                        |            | 1/1 studies reported negative associations |          |

|                                        |                          |                       |                          |                                  |                        |            |                                                                                                                                     |          |
|----------------------------------------|--------------------------|-----------------------|--------------------------|----------------------------------|------------------------|------------|-------------------------------------------------------------------------------------------------------------------------------------|----------|
|                                        |                          |                       |                          |                                  |                        |            | Touchscreen (duration)<br>1/1 studies reported mixed negative and null associations                                                 |          |
|                                        |                          |                       |                          | Musculoskeletal risk             |                        |            |                                                                                                                                     |          |
|                                        |                          |                       |                          | Intervention studies             |                        |            |                                                                                                                                     |          |
| 6 (1) <sup>24</sup>                    | Subject laboratory trial | Serious limitation    | No serious inconsistency | No serious indirectness          | No serious imprecision | Undetected | Touchscreen (duration)<br>1/1 studies reported positive associations                                                                | Moderate |
|                                        |                          |                       |                          | Observational studies            |                        |            |                                                                                                                                     |          |
| 1600 (1) <sup>60</sup>                 | Cohort study             | No serious limitation | No serious inconsistency | No serious indirectness          | No serious imprecision | Undetected | TV (duration)<br>1/1 studies reported positive associations                                                                         | Low      |
|                                        |                          |                       |                          | Healthy dietary behavior quality |                        |            |                                                                                                                                     |          |
|                                        |                          |                       |                          | Observational studies            |                        |            |                                                                                                                                     |          |
| 5637 (5) <sup>14, 20, 56, 57, 65</sup> | Cross-sectional study    | No serious limitation | No serious inconsistency | No serious indirectness          | No serious imprecision | Undetected | TV (duration)<br>5/5 studies reported negative associations                                                                         | Low      |
|                                        |                          |                       |                          | Physical activity                |                        |            |                                                                                                                                     |          |
|                                        |                          |                       |                          | Observational studies            |                        |            |                                                                                                                                     |          |
| 933 (1) <sup>25</sup>                  | Case-control study       | No serious limitation | No serious inconsistency | No serious indirectness          | No serious imprecision | Undetected | TV (duration)<br>1/1 studies reported negative associations                                                                         | Low      |
|                                        |                          |                       |                          | Sedentary activity               |                        |            |                                                                                                                                     |          |
|                                        |                          |                       |                          | Intervention studies             |                        |            |                                                                                                                                     |          |
| 6 (1) <sup>24</sup>                    | Subject laboratory trial | Serious limitation    | No serious inconsistency | No serious indirectness          | No serious imprecision | Undetected | Touchscreen (duration)<br>1/1 studies reported positive associations                                                                | Moderate |
|                                        |                          |                       |                          | Sleep problems                   |                        |            |                                                                                                                                     |          |
|                                        |                          |                       |                          | Intervention studies             |                        |            |                                                                                                                                     |          |
| 1679 (3) <sup>18, 19, 77</sup>         | RCT                      | No serious limitation | No serious inconsistency | No serious indirectness          | No serious imprecision | Undetected | TV (duration)<br>2/2 studies reported positive associations<br>Screen time (duration)<br>1/1 studies reported positive associations | Moderate |
|                                        |                          |                       |                          | Observational studies            |                        |            |                                                                                                                                     |          |

|                                                              |                       |                       |                          |                         |                        |            |                                                                                                                                                                                                                                                                                                                                                                                                    |          |
|--------------------------------------------------------------|-----------------------|-----------------------|--------------------------|-------------------------|------------------------|------------|----------------------------------------------------------------------------------------------------------------------------------------------------------------------------------------------------------------------------------------------------------------------------------------------------------------------------------------------------------------------------------------------------|----------|
| 933 (1) <sup>25</sup>                                        | Case-control study    | No serious limitation | No serious inconsistency | No serious indirectness | No serious imprecision | Undetected | TV (duration)<br>1/1 studies reported positive associations                                                                                                                                                                                                                                                                                                                                        | Low      |
| 7365 (7) <sup>8, 36, 43, 46, 50, 55, 74</sup>                | Cohort study          | No serious limitation | No serious inconsistency | No serious indirectness | No serious imprecision | Undetected | TV (duration)<br>5/5 studies reported positive associations<br>Screen time (duration)<br>2/2 studies reported positive associations                                                                                                                                                                                                                                                                | Moderate |
| 19081 (12) <sup>4-6, 9, 11, 21, 28, 42, 44, 67, 70, 71</sup> | Cross-sectional study | No serious limitation | No serious inconsistency | No serious indirectness | No serious imprecision | Undetected | TV (duration)<br>5/6 studies reported positive associations<br>1/6 studies reported negative associations<br>TV (prevalence)<br>1/1 studies reported positive associations<br>Touchscreen (duration)<br>1/1 studies reported positive associations<br>Video games (duration)<br>1/1 studies reported positive associations<br>Screen time (duration)<br>3/3 studies reported positive associations | Moderate |
| Aggressive behavior<br>Observational studies                 |                       |                       |                          |                         |                        |            |                                                                                                                                                                                                                                                                                                                                                                                                    |          |
| 3533 (3) <sup>11, 34, 69</sup>                               | Cohort study          | No serious limitation | No serious inconsistency | No serious indirectness | No serious imprecision | Undetected | TV (duration)<br>2/2 studies reported positive associations<br>Screen time (duration)<br>1/1 studies reported positive associations                                                                                                                                                                                                                                                                | Low      |
| Behavioral and emotional outcomes<br>Observational studies   |                       |                       |                          |                         |                        |            |                                                                                                                                                                                                                                                                                                                                                                                                    |          |
| 19103 (9) <sup>10, 17, 23, 37, 40, 46, 47, 64, 69</sup>      | Cohort study          | No serious limitation | No serious inconsistency | No serious indirectness | No serious imprecision | Undetected | TV (duration)<br>5/5 studies reported negative associations<br>Computer games<br>1/1 studies reported negative associations<br>Screen time (duration)                                                                                                                                                                                                                                              | Moderate |



High quality: Further research is very unlikely to change our confidence in the estimate of effect.

Moderate quality: Further research is likely to have an impact on our confidence in the estimate of effect and may change the estimate.

Low quality: Further research is very likely to influence our confidence in the estimate of effect and is likely to change the estimate.

Very low quality: Uncertain about the estimate.

## Reference

1. Ariza AJ, Chen EH, Binns HJ, Christoffel KK. Risk Factors for Overweight in Five- to Six-Year-Old Hispanic-American Children: A Pilot Study. *Journal of Urban Health*. 2004;81(1):150-61.
2. Barr R, Zack E, Garcia A, Muentener P. Infants' attention and responsiveness to television increases with prior exposure and parental interaction. *Infancy*. 2008;13(1):30-56.
3. Bedford R, de Urabain IRS, Cheung CHM, Karmiloff-Smith A, Smith TJ. Toddlers' Fine Motor Milestone Achievement Is Associated with Early Touchscreen Scrolling. *Frontiers in Psychology*. 2016;7.
4. Beyens I, Nathanson AI. Electronic Media Use and Sleep Among Preschoolers: Evidence for Time-Shifted and Less Consolidated Sleep. *Health Communication*. 2019;34(5):537-44.
5. Brambilla P, Giussani M, Pasinato A, Venturelli L, Privitera F, Miraglia Del Giudice E, et al. Sleep habits and pattern in 1-14 years old children and relationship with video devices use and evening and night child activities. *Italian journal of pediatrics*. 2017;43(1):7.
6. Brockmann PE, Diaz B, Damiani F, Villarroel L, Núñez F, Bruni O. Impact of television on the quality of sleep in preschool children. *Sleep Medicine*. 2016;20:140-4.
7. Byeon H, Hong S. Relationship between television viewing and language delay in toddlers: Evidence from a Korea national cross-sectional survey. *PLoS ONE*. 2015;10(3).
8. Cespedes EM, Gillman MW, Kleinman K, Rifas-Shiman SL, Redline S, Taveras EM. Television viewing, bedroom television, and sleep duration from infancy to mid-childhood. *Pediatrics*. 2014;133(5):e1163-e71.
9. Chen B, van Dam RM, Tan CS, Chua HL, Wong PG, Bernard JY, et al. Screen viewing behavior and sleep duration among children aged 2 and below. *BMC public health*. 2019;19(1):59.
10. Cheng S, Maeda T, Yoichi S, Yamagata Z, Tomiwa K. Early television exposure and children's behavioral and social outcomes at age 30 months. *Journal of epidemiology / Japan Epidemiological Association*. 2010;20 Suppl 2:S482-9.
11. Cheung CHM, Bedford R, De Urabain IRS, Karmiloff-Smith A, Smith TJ. Daily touchscreen use in infants and toddlers is associated with reduced sleep and delayed sleep onset. *Scientific Reports*. 2017;7.
12. Christakis DA, Zimmerman FJ. Violent television viewing during preschool is associated with antisocial behavior during school age. *Pediatrics*. 2007;120(5):993-9.
13. Collings PJ, Kelly B, West J, Wright J. Associations of TV Viewing Duration, Meals and Snacks Eaten When Watching TV, and a TV in the Bedroom with Child Adiposity. *Obesity*. 2018;26(10):1619-28.
14. Cox R, Skouteris H, Rutherford L, Fuller-Tyszkiewicz M, Dell' Aquila D, Hardy LL. Television viewing, television content, food intake, physical activity and body mass index: a cross-sectional study of preschool children aged 2-6 years. *Health promotion journal of Australia : official journal of Australian Association of Health Promotion Professionals*. 2012;23(1):58-62.
15. De Coen V, De Bourdeaudhuij I, Verbestel V, Maes L, Vereecken C. Risk factors for childhood overweight: a 30-month longitudinal study of 3- to 6-year-old children. *Public health nutrition*. 2014;17(9):1993-2000.
16. Ebenegger V, Marques-Vidal PM, Munsch S, Quartier V, Nydegger A, Barral J, et al. Relationship of hyperactivity/inattention with adiposity and lifestyle characteristics in preschool children. *Journal of Child Neurology*. 2012;27(7):852-8.
17. Foster EM, Watkins S. The value of reanalysis: TV viewing and attention problems. *Child Development*. 2010;81(1):368-75.
18. Garrison MM, Christakis D. The sustained impact of a healthy media use intervention on preschool

child sleep.

19. Garrison MM, Christakis DA. The Impact of a Healthy Media Use Intervention on Sleep in Preschool Children. *Pediatrics*. 2012;130(3):492-9.
20. Gubbels JS, Kremers SPI, Stafleu A, Dagnelie PC, de Vries SI, de Vries NK, et al. Clustering of Dietary Intake and Sedentary Behavior in 2-Year-Old Children. *Journal of Pediatrics*. 2009;155(2):194-8.
21. Helm AF, Spencer RMC. Television use and its effects on sleep in early childhood. *Sleep health*. 2019;5(3):241-7.
22. Hinkley T, Timperio A, Salmon J, Hesketh K. Does Preschool Physical Activity and Electronic Media Use Predict Later Social and Emotional Skills at 6 to 8 Years? A Cohort Study. *Journal of physical activity & health*. 2017;14(4):308-16.
23. Hinkley T, Verbestel V, Ahrens W, Lissner L, Molnar D, Moreno LA, et al. Early Childhood Electronic Media Use as a Predictor of Poorer Well-being A Prospective Cohort Study. *Jama Pediatrics*. 2014;168(5):485-92.
24. Howie EK, Coenen P, Campbell AC, Ranelli S, Straker LM. Head, trunk and arm posture amplitude and variation, muscle activity, sedentariness and physical activity of 3 to 5 year-old children during tablet computer use compared to television watching and toy play. *Applied Ergonomics*. 2017;65:41-50.
25. Hu JJ, Ding N, Yang L, Ma YA, Gao M, Wen DL. Association between television viewing and early childhood overweight and obesity: a pair-matched case-control study in China. *Bmc Pediatrics*. 2019;19.
26. Inoue S, Yorifuji T, Kato T, Sanada S, Doi H, Kawachi I. Children's Media Use and Self-Regulation Behavior: Longitudinal Associations in a Nationwide Japanese Study. *Maternal and child health journal*. 2016;20(10):2084-99.
27. Jago R, Baranowski T, Baranowski JC, Thompson D, Greaves KA. BMI from 3-6y of age is predicted by TV viewing and physical activity, not diet. *International Journal of Obesity*. 2005;29(6):557-64.
28. Ji MM, Tang A, Zhang YF, Zou JJ, Zhou GY, Deng J, et al. The Relationship between Obesity, Sleep and Physical Activity in Chinese Preschool Children. *International Journal of Environmental Research and Public Health*. 2018;15(3).
29. Jouret B, Ahluwalia N, Cristini C, Dupuy M, Nègre-Pages L, Grandjean H, et al. Factors associated with overweight in preschool-age children in southwestern France. *American Journal of Clinical Nutrition*. 2007;85(6):1643-9.
30. Kirkorian HL, Choi K, Pempek TA. Toddlers' Word Learning From Contingent and Noncontingent Video on Touch Screens. *Child development*. 2016;87(2):405-13.
31. Lillard AS, Peterson J. The immediate impact of different types of television on young children's executive function. *Pediatrics*. 2011;128(4):644-9.
32. Lin LY, Cherg RJ, Chen YJ, Chen YJ, Yang HM. Effects of television exposure on developmental skills among young children. *Infant Behavior and Development*. 2015;38:20-6.
33. Lumeng JC, Rahnema S, Appugliese D, Kaciroti N, Bradley RH. Television exposure and overweight risk in preschoolers. *Archives of Pediatrics and Adolescent Medicine*. 2006;160(4):417-22.
34. Manganello JA, Taylor CA. Television Exposure as a Risk Factor for Aggressive Behavior Among 3-Year-Old Children. *Archives of Pediatrics & Adolescent Medicine*. 2009;163(11):1037-45.
35. Manios Y, Kourlaba G, Kondaki K, Grammatikaki E, Anastasiadou A, Roma-Giannikou E. Obesity and television watching in preschoolers in greece: The genesis study. *Obesity*. 2009;17(11):2047-53.
36. Marinelli M, Sunyer J, Alvarez-Pedrerol M, Iñiguez C, Torrent M, Vioque J, et al. Hours of television viewing and sleep duration in children a multicenter birth cohort study. *JAMA Pediatrics*. 2014;168(5):458-64.

37. McNeill J, Howard SJ, Vella SA, Cliff DP. Longitudinal Associations of Electronic Application Use and Media Program Viewing with Cognitive and Psychosocial Development in Preschoolers. *Academic Pediatrics*. 2019;19(5):520-8.
38. Mendoza JA, Zimmerman FJ, Christakis DA. Television viewing, computer use, obesity, and adiposity in US preschool children. *International Journal of Behavioral Nutrition and Physical Activity*. 2007;4.
39. Mezie-Okoye MM, Alex-Hart B. Overweight and obesity among preschool children in Port Harcourt, Nigeria. *Pakistan Journal of Nutrition*. 2015;14(4):209-13.
40. Miller CJ, Marks DJ, Miller SR, Berwid OG, Kera EC, Santra A, et al. Brief report: Television viewing and risk for attention problems in preschool children. *Journal of Pediatric Psychology*. 2007;32(4):448-52.
41. Nathanson AI, Aladé F, Sharp ML, Rasmussen EE, Christy K. The relation between television exposure and executive function among preschoolers. *Developmental psychology*. 2014;50(5):1497-506.
42. Nathanson AI, Beyens I. The Relation Between Use of Mobile Electronic Devices and Bedtime Resistance, Sleep Duration, and Daytime Sleepiness Among Preschoolers. *Behavioral sleep medicine*. 2018;16(2):202-19.
43. Nevarez MD, Rifas-Shiman SL, Kleinman KP, Gillman MW, Taveras EM. Associations of early life risk factors with infant sleep duration. *Academic Pediatrics*. 2010;10(3):187-93.
44. Paavonen EJ, Pennonen M, Roine M, Valkonen S, Lahikainen AR. TV exposure associated with sleep disturbances in 5-to 6-year-old children. *Journal of Sleep Research*. 2006;15(2):154-61.
45. Pagani LS, Fitzpatrick C, Barnett TA. Early childhood television viewing and kindergarten entry readiness. *Pediatric research*. 2013;74(3):350-5.
46. Parent J, Sanders W, Forehand R. Youth Screen Time and Behavioral Health Problems: The Role of Sleep Duration and Disturbances. *Journal of developmental and behavioral pediatrics : JDBP*. 2016;37(4):277-84.
47. Parkes A, Sweeting H, Wight D, Henderson M. Do television and electronic games predict children's psychosocial adjustment? Longitudinal research using the UK Millennium Cohort Study. *Archives of Disease in Childhood*. 2013;98(5):341-8.
48. Peck T, Scharf RJ, Conaway MR, DeBoer MD. Viewing as little as 1 hour of TV daily is associated with higher change in BMI between kindergarten and first grade. *Obesity*. 2015;23(8):1680-6.
49. Pinhas-hamiel O, Bar-zvi E, Boyko V, Reichman B, Lerner-geva L. Prevalence of overweight in kindergarten children in the centre of Israel - Association with lifestyle habits. *Child: Care, Health and Development*. 2009;35(2):147-52.
50. Plancoulaine S, Reynaud E, Forhan A, Lioret S, Heude B, Charles MA, et al. Night sleep duration trajectories and associated factors among preschool children from the EDEN cohort. *Sleep Medicine*. 2018;48:194-201.
51. Raman S, Guerrero-Duby S, McCullough JL, Brown M, Ostrowski-Delahanty S, Langkamp D, et al. Screen exposure during daily routines and a young child's risk for having social-emotional delay. *Clinical Pediatrics*. 2017;56(13):1244-53.
52. Reilly JJ, Armstrong J, Dorosty AR, Emmett PM, Ness A, Rogers I, et al. Early life risk factors for obesity in childhood: cohort study. *Bmj-British Medical Journal*. 2005;330(7504):1357-9.
53. Ribner A, Fitzpatrick C, Blair C. Family Socioeconomic Status Moderates Associations Between Television Viewing and School Readiness Skills. *Journal of developmental and behavioral pediatrics : JDBP*. 2017;38(3):233-9.



54. Ruangdaraganon N, Chuthapisith J, Mo-suwan L, Kriweradechachai S, Udomsubpayakul U, Choprapawon C. Television viewing in Thai infants and toddlers: Impacts to language development and parental perceptions. *BMC Pediatrics*. 2009;9.
55. Sijtsma A, Koller M, Sauer PJ, Corpeleijn E. Television, sleep, outdoor play and BMI in young children: the GECKO Drenthe cohort. *European journal of pediatrics*. 2015;174(5):631-9.
56. Sisson SB, Broyles ST, Robledo C, Boeckman L, Leyva M. Television viewing and variations in energy intake in adults and children in the USA. *Public health nutrition*. 2012;15(4):609-17.
57. Sisson SB, Shay CM, Broyles ST, Leyva M. Television-viewing time and dietary quality among U.S. children and adults. *American Journal of Preventive Medicine*. 2012;43(2):196-200.
58. Skaug S, Englund KT, Wichstrøm L. Young children's television viewing and the quality of their interactions with parents: A prospective community study. *Scandinavian journal of psychology*. 2018;59(5):503-10.
59. Sorrie MB, Yesuf ME, Gebremichael TG. Overweight/Obesity and associated factors among preschool children in Gondar City, Northwest Ethiopia: A cross-sectional study. *PLoS ONE*. 2017;12(8).
60. Straker LM, Pollock CM, Zubrick SR, Kurinczuk JJ. The association between information and communication technology exposure and physical activity, musculoskeletal and visual symptoms and socio-economic status in 5-year-olds. *Child: Care, Health and Development*. 2006;32(3):343-51.
61. Sugimori H, Yoshida K, Izuno T, Miyakawa M, Suka M, Sekine M, et al. Analysis of factors that influence body mass index from ages 3 to 6 years: A study based on the Toyama cohort study. *Pediatrics International*. 2004;46(3):302-10.
62. Suglia SF, Duarte CS, Chambers EC, Boynton-Jarrett R. Social and behavioral risk factors for obesity in early childhood.
63. Tahir MJ, Willett W, Forman MR. The Association of Television Viewing in Childhood With Overweight and Obesity Throughout the Life Course. *American Journal of Epidemiology*. 2019;188(2):282-93.
64. Tamana SK, Ezeugwu V, Chikuma J, Lefebvre DL, Azad MB, Moraes TJ, et al. Screen-time is associated with inattention problems in preschoolers: Results from the CHILD birth cohort study. *Plos One*. 2019;14(4).
65. Taveras EM, Sandora TJ, Shih MC, Ross-Degnan D, Goldmann DA, Gillman MW. The association of television and video viewing with fast food intake by preschool-age children. *Obesity*. 2006;14(11):2034-41.
66. Tester JM, Phan TT, Tucker JM, Leung CW, Dreyer Gillette ML, Sweeney BR, et al. Characteristics of Children 2 to 5 Years of Age With Severe Obesity. *Pediatrics*. 2018;141(3).
67. Thompson DA, Christakis DA. The association between television viewing and irregular sleep schedules among children less than 3 years of age. *Pediatrics*. 2005;116(4):851-6.
68. Tomopoulos S, Dreyer BP, Berkule S, Fierman AH, Brockmeyer C, Mendelsohn AL. Infant media exposure and toddler development. *Archives of Pediatrics and Adolescent Medicine*. 2010;164(12):1105-11.
69. Tomopoulos S, Dreyer BP, Valdez P, Flynn V, Foley G, Berkule SB, et al. Media Content and Externalizing Behaviors in Latino Toddlers. *Ambulatory Pediatrics*. 2007;7(3):232-8.
70. Tso W, Rao N, Jiang F, Li AM, Lee SL, Ho FKW, et al. Sleep Duration and School Readiness of Chinese Preschool Children. *Journal of Pediatrics*. 2016;169:266-71.
71. Twenge JM, Hisler GC, Krizan Z. Associations between screen time and sleep duration are primarily driven by portable electronic devices: evidence from a population-based study of U.S. children ages 0–

17. Sleep Medicine. 2019;56:211-8.
72. Vallejo M, Cortes-Rodríguez BA, Colin-Ramirez E. Maternal Underestimation of Child's Weight Status and Health Behaviors as Risk Factors for Overweight in Children. *Journal of pediatric nursing*. 2015;30(6):e29-e33.
73. Verlinden M, Tiemeier H, Veenstra R, Mieloo CL, Jansen W, Jaddoe VWV, et al. Television viewing through ages 2-5 years and bullying involvement in early elementary school. *Bmc Public Health*. 2014;14.
74. Vijakhana N, Wilaisakditipakorn T, Ruedeekhajorn K, Pruksananonda C, Chonchaiya W. Evening media exposure reduces night-time sleep. *Acta Paediatrica, International Journal of Paediatrics*. 2015;104(3):306-12.
75. Watt E, Fitzpatrick C, Derevensky JL, Pagani LS. Too Much Television? Prospective Associations Between Early Childhood Televiewing and Later Self-reports of Victimization by Sixth Grade Classmates. *Journal of developmental and behavioral pediatrics : JDBP*. 2015;36(6):426-33.
76. Wu X, Tao S, Rutayisire E, Chen Y, Huang K, Tao F. The relationship between screen time, nighttime sleep duration, and behavioural problems in preschool children in China. *European Child and Adolescent Psychiatry*. 2017;26(5):541-8.
77. Xu H, Wen LM, Hardy LL, Rissel C. Associations of outdoor play and screen time with nocturnal sleep duration and pattern among young children. *Acta paediatrica (Oslo, Norway : 1992)*. 2016;105(3):297-303.
78. Zhao J, Zhang Y, Jiang F, Ip P, Ho FKW, Zhang Y, et al. Excessive Screen Time and Psychosocial Well-Being: The Mediating Role of Body Mass Index, Sleep Duration, and Parent-Child Interaction. *Journal of Pediatrics*. 2018;202:157-62.e1.
79. Zimmerman FJ, Christakis DA. Children's television viewing and cognitive outcomes: A longitudinal analysis of national data. *Archives of Pediatrics and Adolescent Medicine*. 2005;159(7):619-25.
80. Zimmerman FJ, Christakis DA, Meltzoff AN. Associations between Media Viewing and Language Development in Children Under Age 2 Years. *Journal of Pediatrics*. 2007;151(4):364-8.
